# Supplementary material for: 2D perovskite stabilized phase-pure formamidinium perovskite solar cells
Source: PubMed Central journal article supplement (PMC6070510; doi:10.1038/s41467-018-05454-4), 2018-08-01
Supplement: 41467_2018_5454_MOESM1_ESM.pdf [file 41467_2018_5454_MOESM1_ESM.pdf]

Supplementary information

**2D perovskite stabilized phase-pure formamidinium perovskite  
solar cells**

Jin-Wook Lee, Zhenghong Dai, Tae-Hee Han, Chungseok Choi, Sheng-Yung Chang, Sung-Joon Lee, Nicholas De Marco, Hongxiang Zhao, Pengyu Sun, Yu Huang and Yang Yang\*

\*Corresponding author

E-mail: [yangy@ucla.edu](mailto:yangy@ucla.edu)

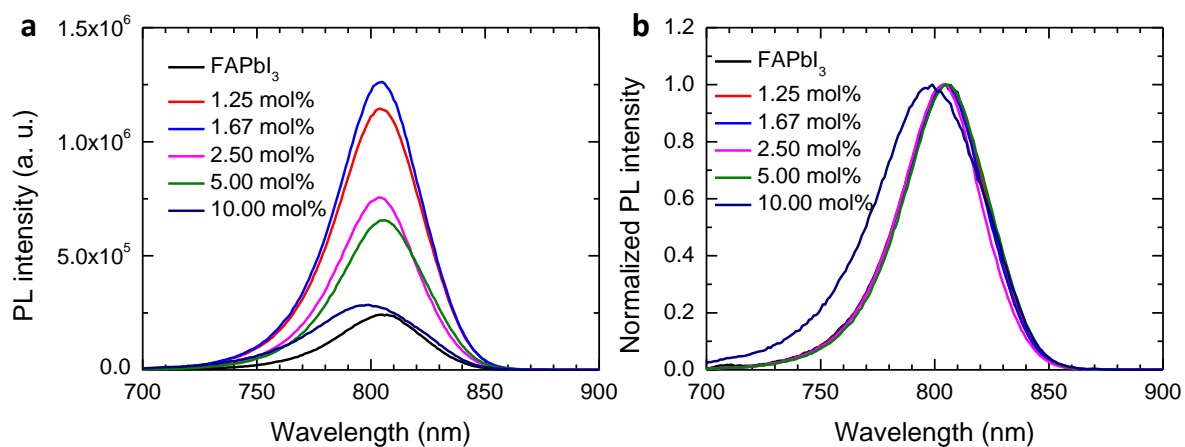

**Supplementary Figure 1| Effect of 2D perovskite on photoluminescence properties.** Steady-state photoluminescence spectra of FAPbI<sub>3</sub> perovskite film with different amount of added 2D PEA<sub>2</sub>PbI<sub>4</sub> perovskite. (a) Original and (b) normalized spectra.

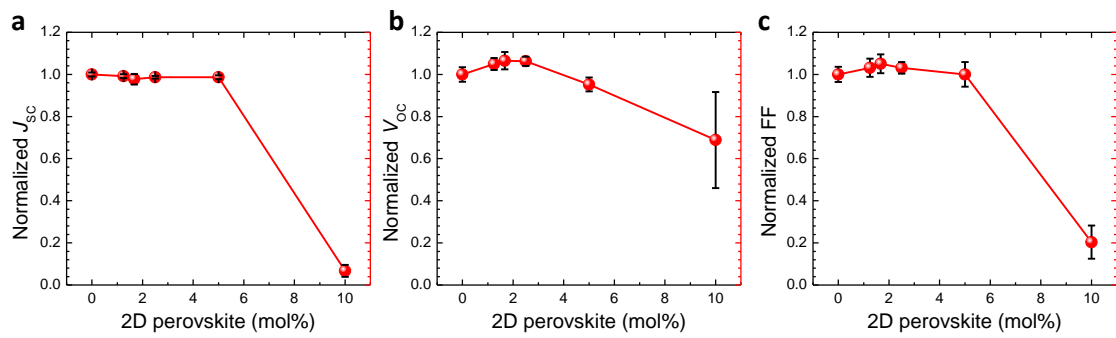

**Supplementary Figure 2| Effect of 2D perovskite on photovoltaic performance.** Normalized (a) short-circuit current density ( $J_{SC}$ ), (b) open circuit voltage ( $V_{OC}$ ) and (c) fill factor (FF) of planar FAPbI<sub>3</sub> perovskite solar cells with different amount of the added 2D PEA<sub>2</sub>PbI<sub>4</sub> perovskite. The photovoltaic parameters are obtained from reverse scan (from  $V_{OC}$  to  $J_{SC}$ ) with scan rate of 0.1 Vs<sup>-1</sup>. The error bar of the normalized PCE indicates standard deviation of the PCEs. At least 10 devices were fabricated for each condition.

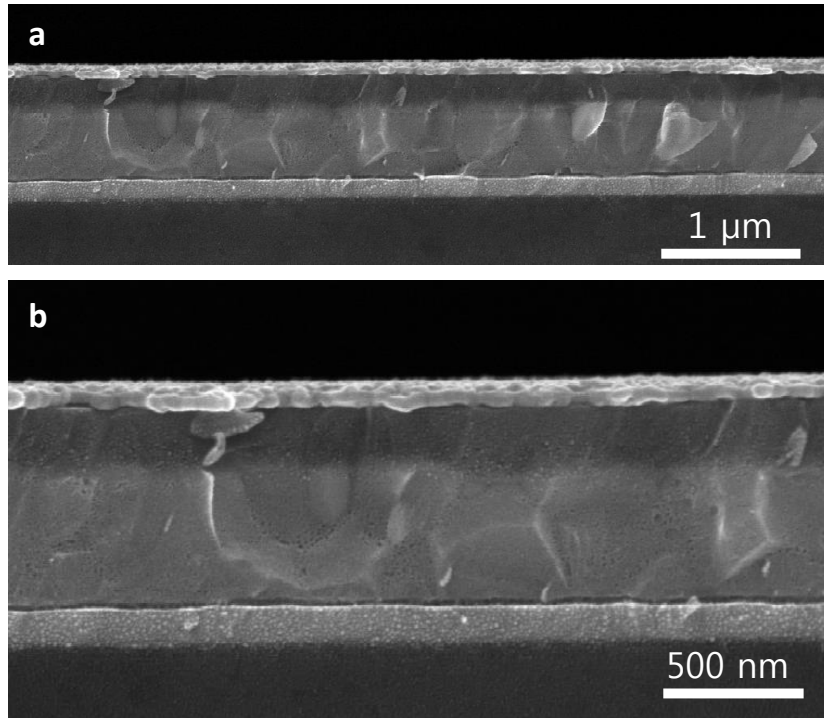

**Supplementary Figure 3| Cross sectional scanning electron microscopic (SEM).** Cross-sectional SEM images of the device with 1.67 mol% of  $\text{PEA}_2\text{PbI}_4$  2D perovskite. The structure of the device is ITO/compact- $\text{SnO}_2$ /perovskite/spiro-MeOTAD/Ag or Au. (a) Lower and (b) higher magnification images.

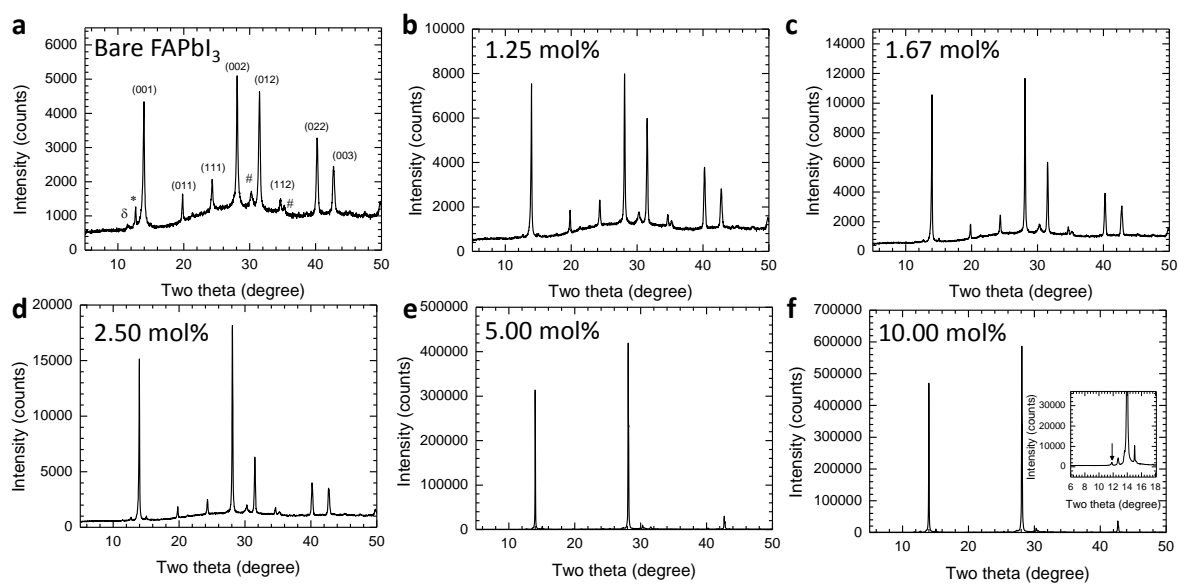

**Supplementary Figure 4| X-ray diffraction patterns with different amount of 2D perovskite.** (a) bare FAPbI<sub>3</sub>, with (b) 1.25 mol%, (c) 1.67 mol%, (d) 2.50 mol%, (e) 5.00 mol% and (f) 10.00 mol% 2D PEA<sub>2</sub>PbI<sub>4</sub> perovskite. Peaks from cubic FAPbI<sub>3</sub> phase were indexed in a. δ and \* indicate hexagonal FAPbI<sub>3</sub> and PbI<sub>2</sub>, respectively.

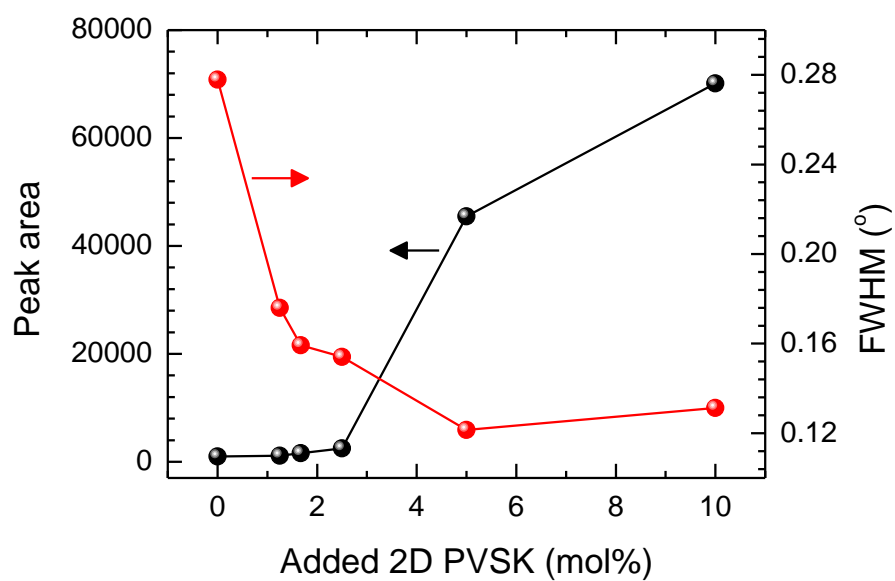

**Supplementary Figure 5| Crystallinity dependent on added 2D perovskite.** Peak area and full-width-half-maximum (FWHM) calculated from X-ray diffraction patterns with different amount of  $\text{PEA}_2\text{PbI}_4$  in Supplementary Figure 4. The (002) peak (at around  $28^\circ$ ) was used for the Gauss fit.

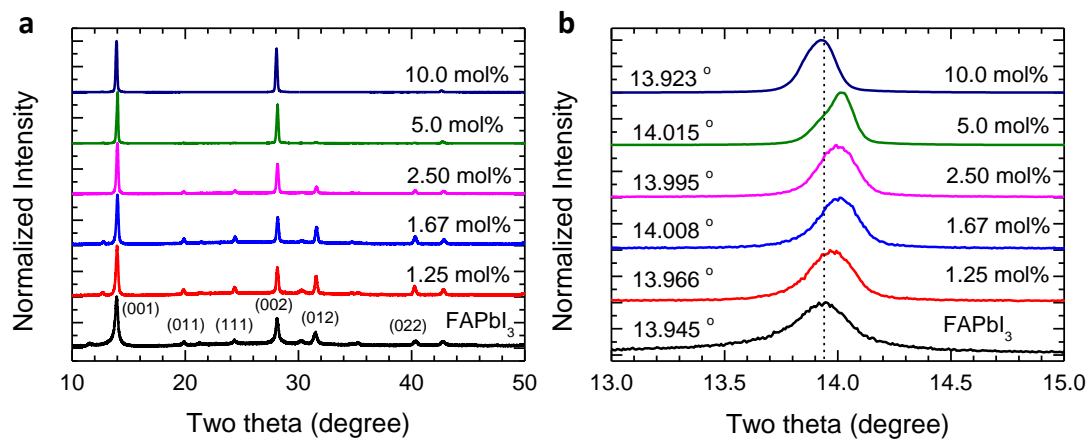

**Supplementary Figure 6 | Normalized X-ray diffraction (XRD) patterns.** Normalized XRD patterns of FAPbI<sub>3</sub> perovskite films with different amount of added 2D PEA<sub>2</sub>PbI<sub>4</sub> perovskite. (a) full spectra and (b) magnified (001) orientation peaks

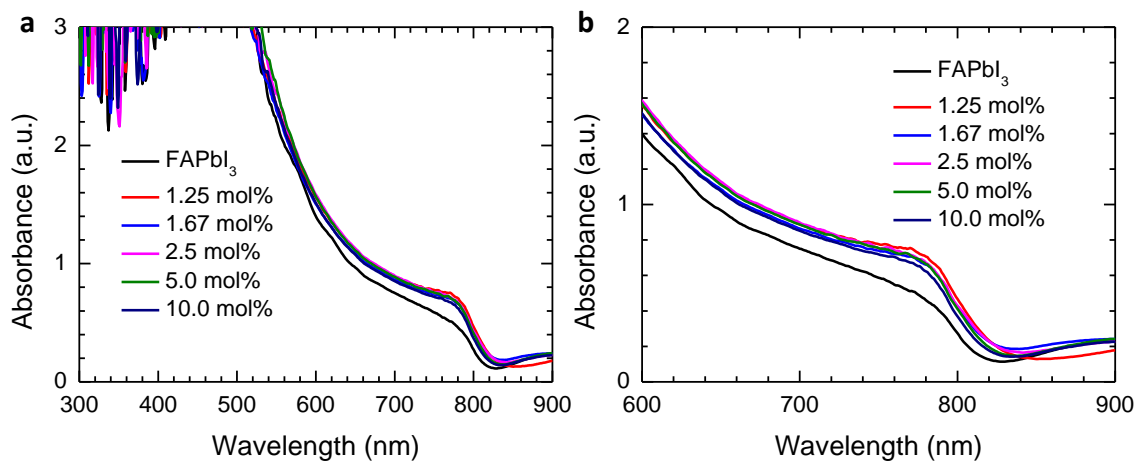

**Supplementary Figure 7 | Effect of added 2D perovskite on absorption spectra.** Absorption spectra of FAPbI<sub>3</sub> perovskite films with different amount of added 2D PEA<sub>2</sub>PbI<sub>4</sub> perovskite. (a) full spectra and (b) magnified onset region



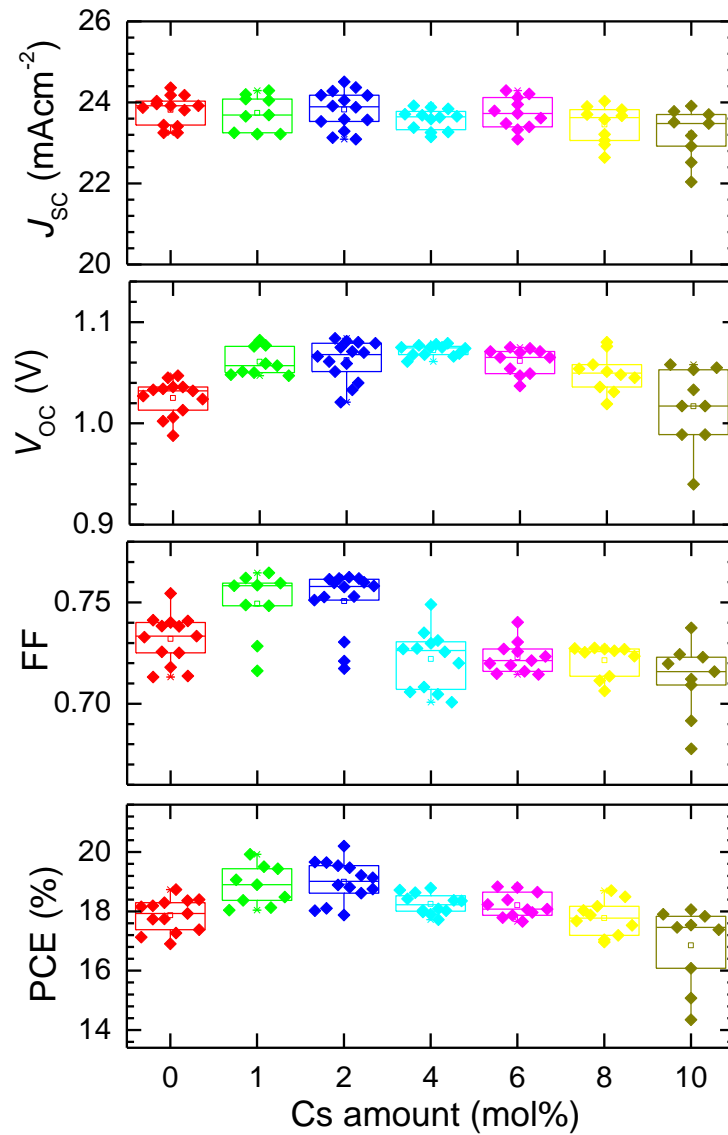

**Supplementary Figure 8 | Effect of cesium (Cs) amount on photovoltaic performance.** Short-circuit current density ( $J_{sc}$ ), open circuit voltage ( $V_{oc}$ ), fill factor (FF) and power conversion efficiency (PCE) of FAPbI<sub>3</sub> perovskite solar cells incorporating 1.67 mol% PEA<sub>2</sub>PbI<sub>4</sub> and different Cs amount. The photovoltaic parameters are obtained from reverse scan (from  $V_{oc}$  to  $J_{sc}$ ) with scan rate of 0.1 Vs<sup>-1</sup>.

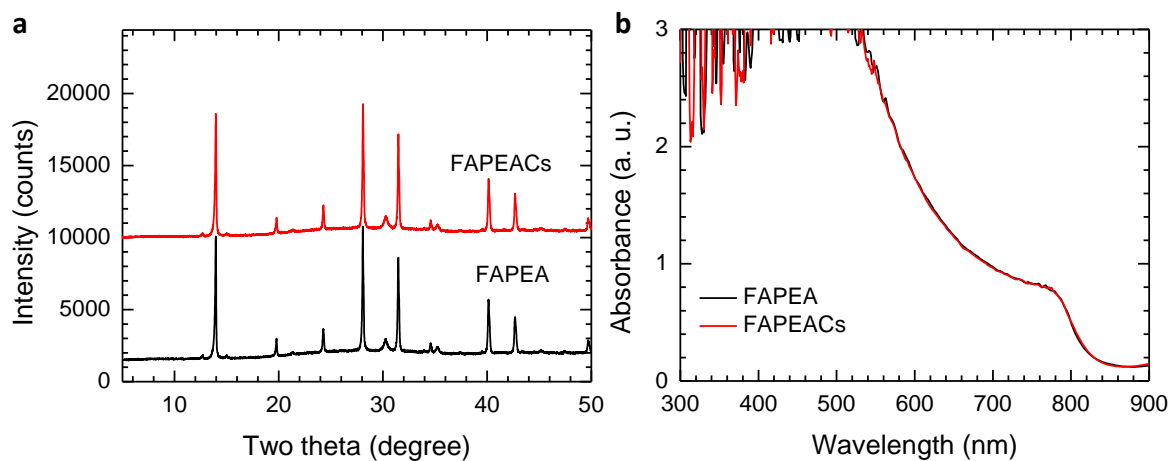

**Supplementary Figure 9 | Effect of Cs on crystal structure and absorption.** Comparison of (a) X-ray diffraction pattern and (b) absorption spectra of  $\text{FAPbI}_3$  with 1.67 mol%  $\text{PEA}_2\text{PbI}_4$  (FAPEA) and  $\text{FA}_{0.98}\text{Cs}_{0.02}\text{PbI}_3$  with 1.67 mol%  $\text{PEA}_2\text{PbI}_4$  (FAPEACs).

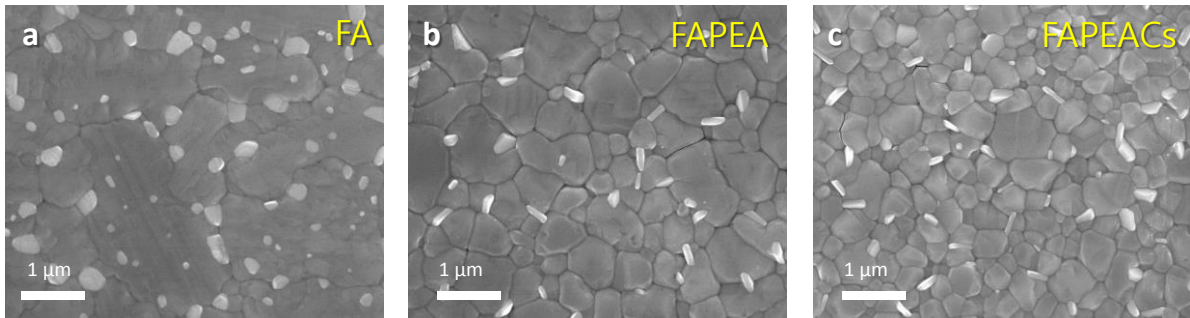

**Supplementary Figure 10| Effect of Cs on morphology of perovskite film.** Surface scanning electron microscopic (SEM) images of **a**, bare FAPbI<sub>3</sub> (FA), **b**, with 1.67 mol% PEA<sub>2</sub>PbI<sub>4</sub> (FAPEA) and **c**, FA<sub>0.98</sub>Cs<sub>0.02</sub>PbI<sub>3</sub> with 1.67 mol% PEA<sub>2</sub>PbI<sub>4</sub> (FAPEACs).

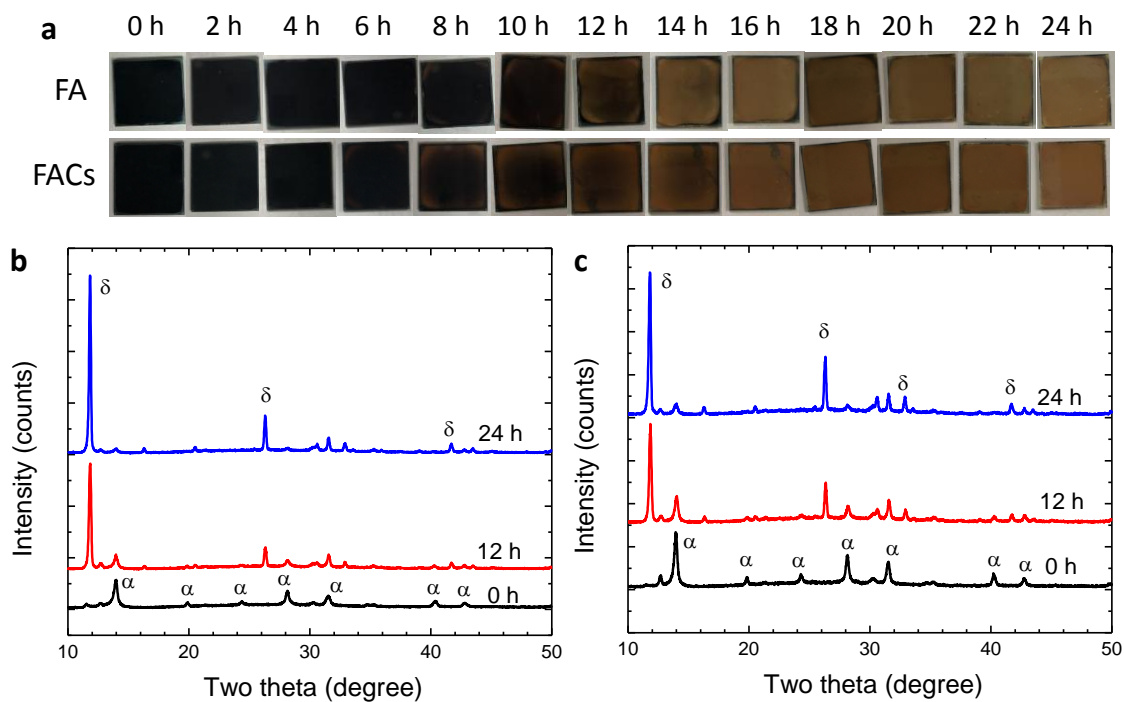

**Supplementary Figure 11| Humidity stability of FAPbI<sub>3</sub> and FA<sub>0.98</sub>Cs<sub>0.02</sub>PbI<sub>3</sub> perovskites.** (a) photos and (b, c) X-ray diffraction patterns of the FAPbI<sub>3</sub> and FA<sub>0.98</sub>Cs<sub>0.02</sub>PbI<sub>3</sub> perovskite films with exposure to relative humidity (RH) of 70±5% at 20±2 ° for different time. Peaks from cubic FAPbI<sub>3</sub> phase were indexed by  $\alpha$  whereas  $\delta$  and \* indicate hexagonal FAPbI<sub>3</sub> and PbI<sub>2</sub>, respectively.

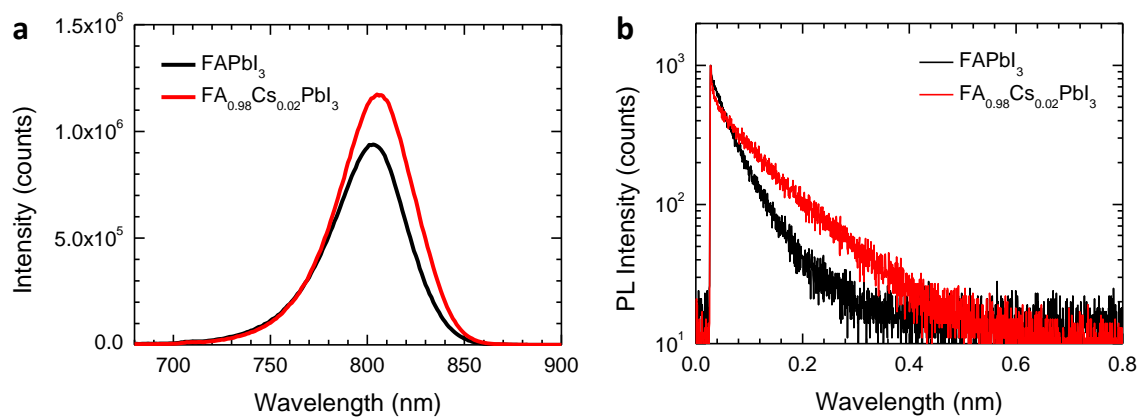

**Supplementary Figure 12 | Photoluminescence (PL) properties.** (a) Steady-state and (b) time-resolved PL measurements of the FAPbI<sub>3</sub> and FA<sub>0.98</sub>Cs<sub>0.02</sub>PbI<sub>3</sub> perovskite films.

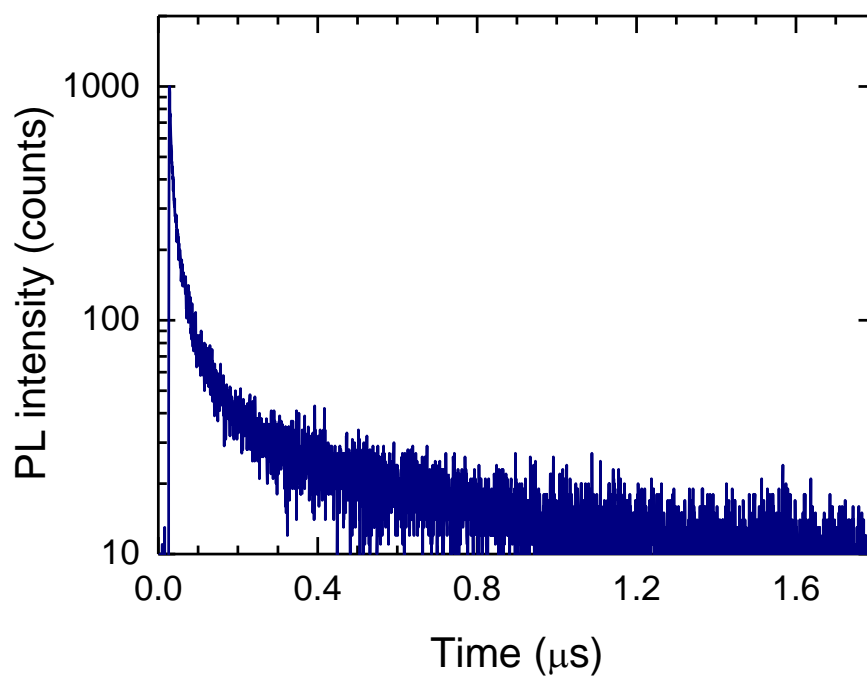

**Supplementary Figure 13| Photoluminescence decay profile of quasi-3D perovskite.** Time-resolved photoluminescence decay profile of the  $\text{FAPbI}_3$  perovskite film with incorporation of 10 mol% of  $\text{PEA}_2\text{PbI}_4$  perovskite.

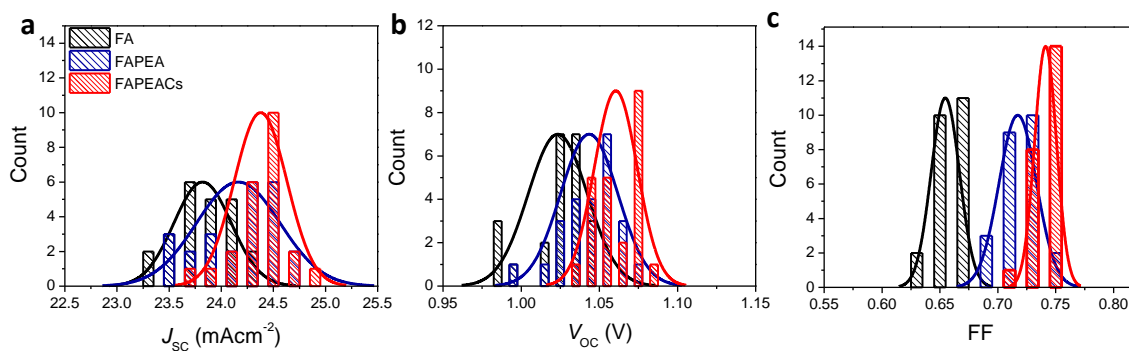

**Supplementary Figure 14| Photovoltaic parameters with 2D perovskite and Cs.** (a) Short-circuit current density ( $J_{SC}$ ), (b) open circuit voltage ( $V_{OC}$ ) and (c) fill factor (FF) of the device incorporating bare  $\text{FAPbI}_3$  (FA),  $\text{FAPbI}_3$  with 1.67 mol%  $\text{PEA}_2\text{PbI}_4$  (FAPEA) and  $\text{FA}_{0.98}\text{Cs}_{0.02}\text{PbI}_3$  with 1.67 mol%  $\text{PEA}_2\text{PbI}_4$  (FAPEACs). The photovoltaic parameters are obtained from reverse scan (from  $V_{OC}$  to  $J_{SC}$ ) with scan rate of  $0.1 \text{ Vs}^{-1}$ . All the devices were fabricated in same batch.

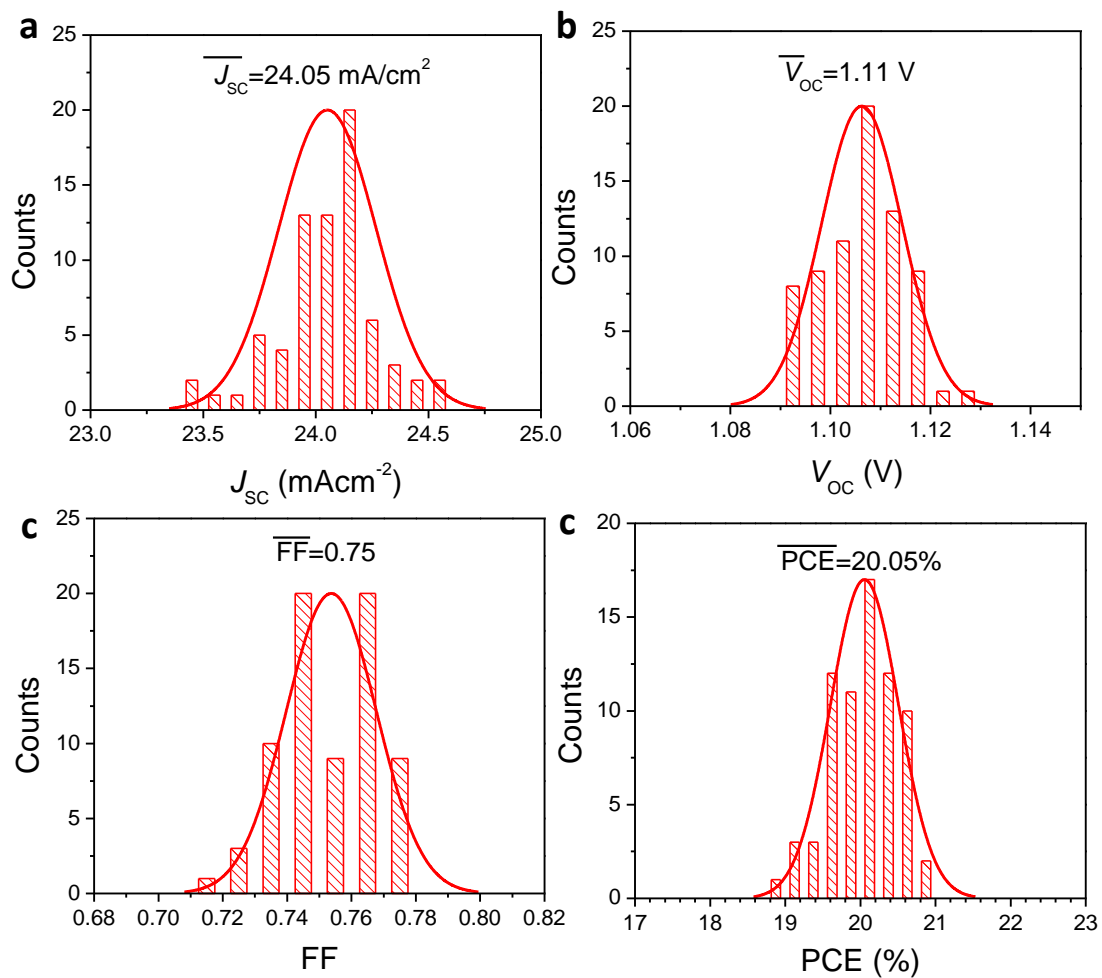

**Supplementary Figure 15 | Distribution of photovoltaic parameters for target devices.** (a) Short-circuit current density ( $J_{sc}$ ), (b) open circuit voltage ( $V_{oc}$ ), (c) fill factor (FF) and (d) power conversion efficiency (PCE) of the device incorporating  $\text{FA}_{0.98}\text{Cs}_{0.02}\text{PbI}_3$ , with 1.67 mol%  $\text{PEA}_2\text{PbI}_4$ . 74 devices were fabricated from two different batches.



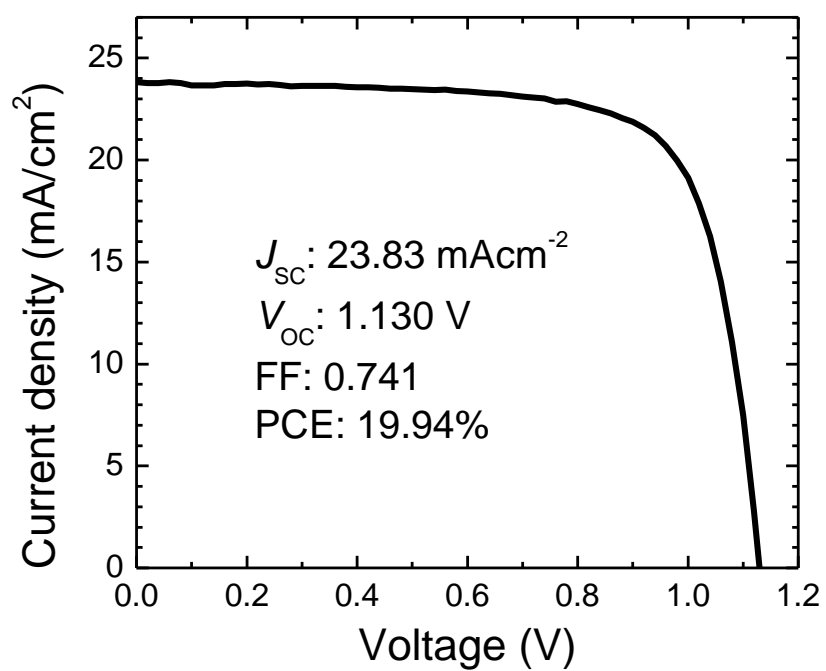

**Supplementary Figure 16| A target device with the highest open-circuit voltage ( $V_{oc}$ ).** Current density-voltage ( $J$ - $V$ ) curve of the target device showing the highest  $V_{oc}$ . The  $J$ - $V$  curve was obtained from reverse scan with scan rate of 0.1 V s<sup>-1</sup>.

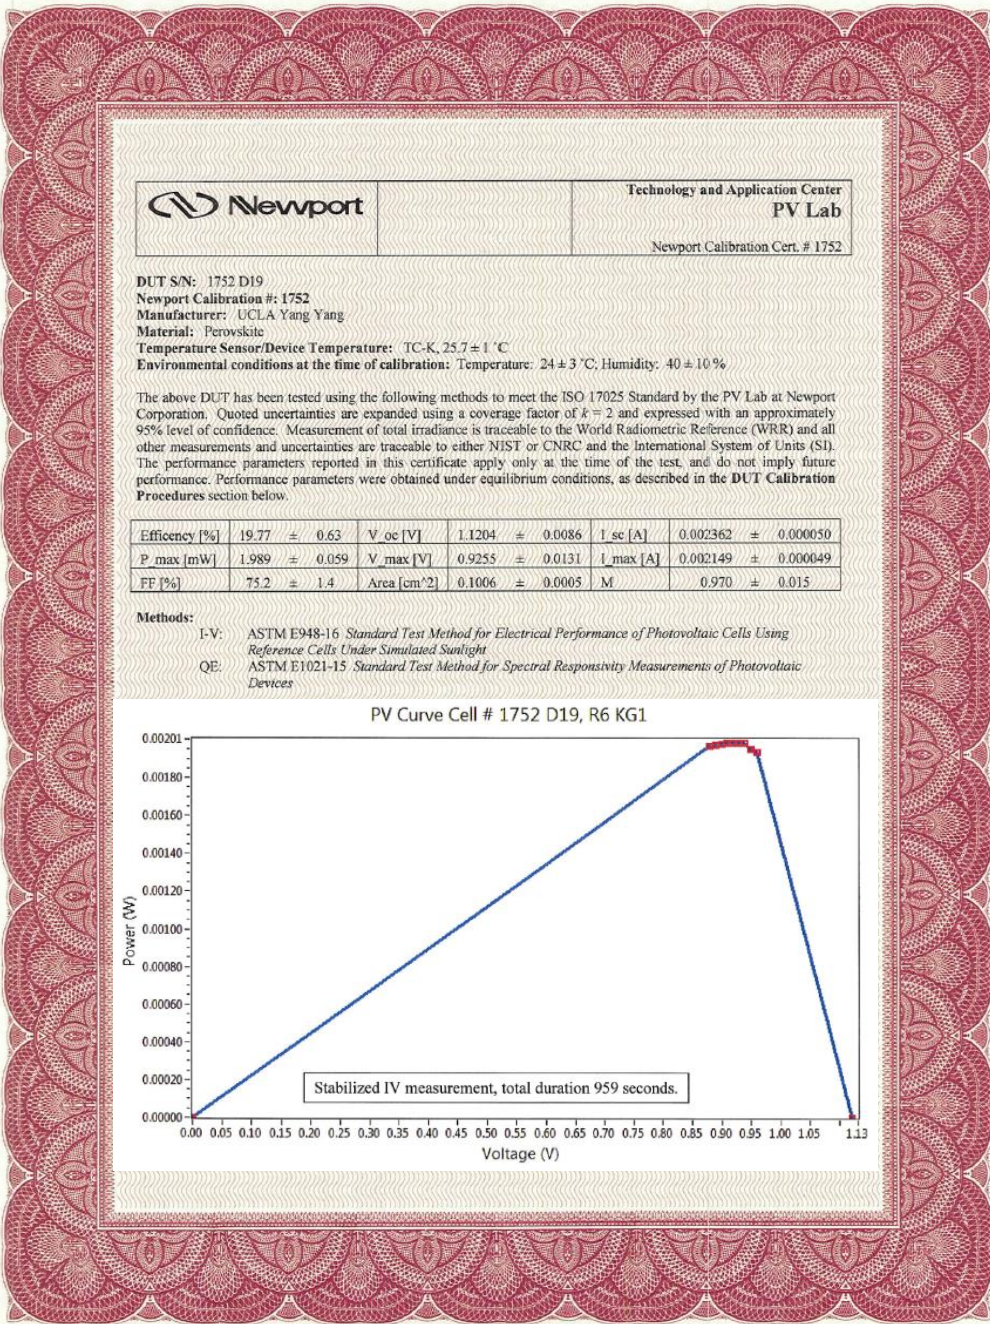

**Supplementary Figure 17| Certified stabilized efficiency.** Certified stabilized efficiency for a target device. All the parameters are stabilized. A bias voltage-stabilized out power curve is included.

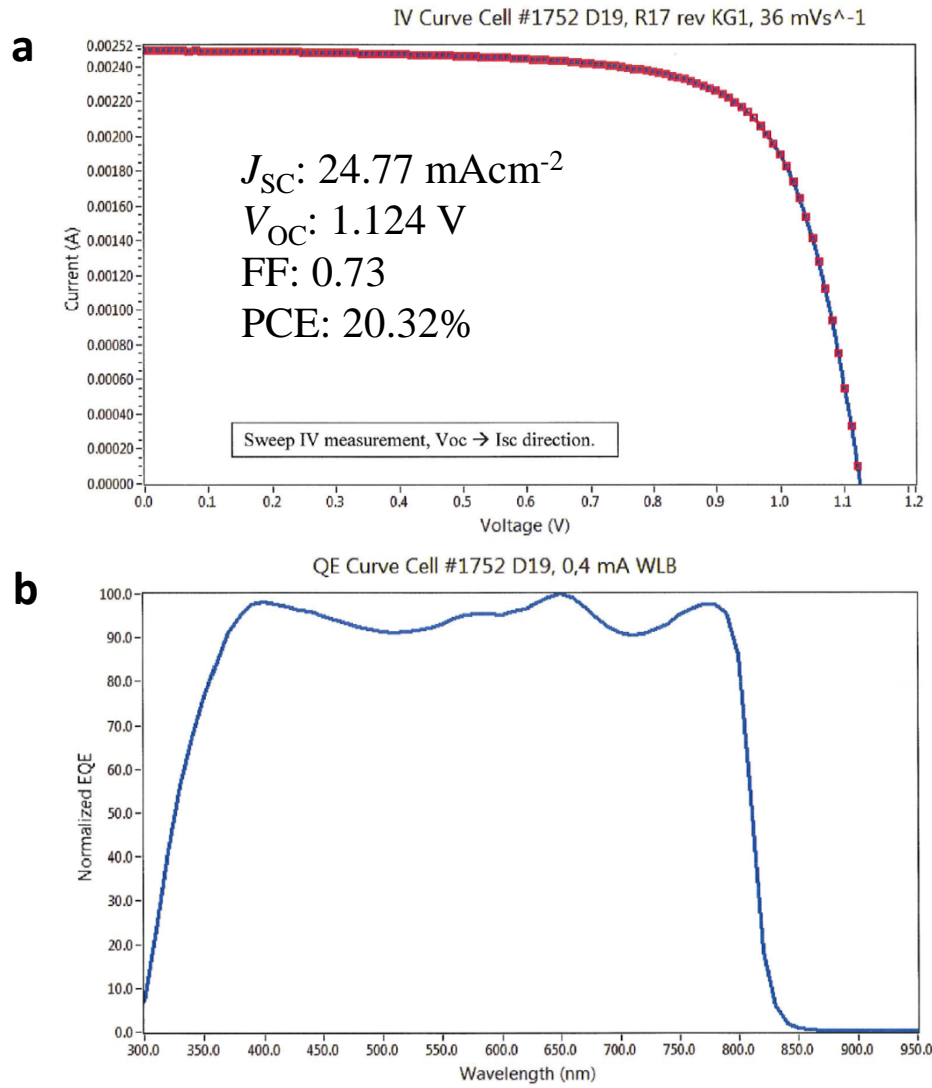

**Supplementary Figure 18| *J-V* and EQE curves of the certified device.** (a) Current density-voltage (*J-V*) curve and (b) normalized external quantum efficiency (EQE) curve for the certified device provided by Newport Corporation. The *J-V* curve was obtained from reverse scan (from  $V_{OC}$  to  $J_{SC}$ ) with scan rate of  $36 \text{ mVs}^{-1}$ .

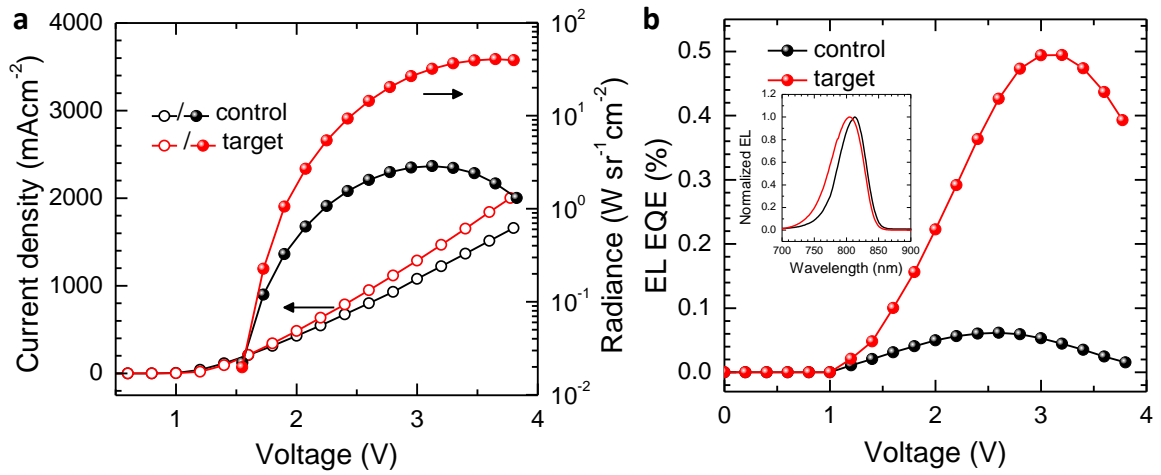

**Supplementary Figure 19| Electroluminescence properties of control and target devices.** (a) Current density-voltage curve and measured radiance of the control and target devices. (b) Calculated electroluminescence external quantum efficiency (EL EQE) spectra for the control and target devices. Inset of B shows normalized EL spectra of the devices at bias voltage of 2 V.

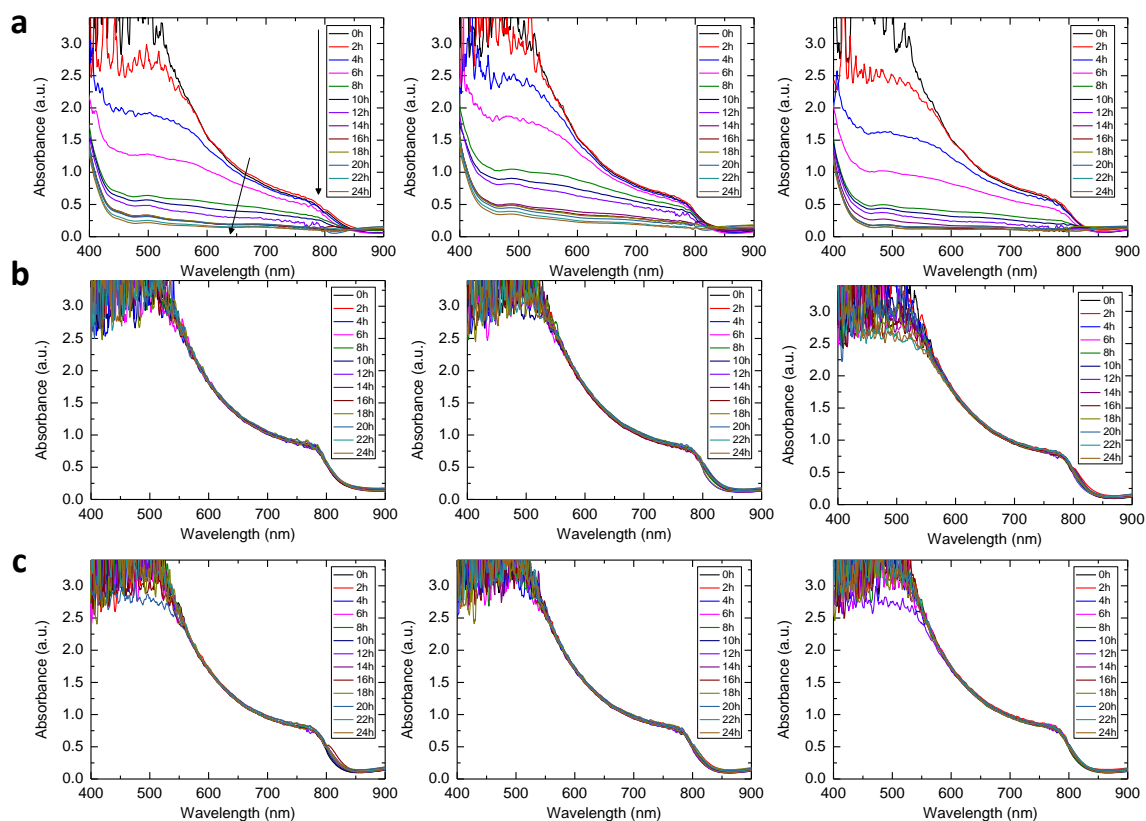

**Supplementary Figure 20| Evolution of absorption under high relative humidity (RH).** Evolution of absorption spectra under relative humidity of  $80\pm 5\%$ . (a) bare FAPbI<sub>3</sub>, (b) FAPbI<sub>3</sub> with 1.67 mol% PEA<sub>2</sub>PbI<sub>4</sub> and (c) FA<sub>0.98</sub>Cs<sub>0.2</sub>PbI<sub>3</sub> with 1.67 mol% PEA<sub>2</sub>PbI<sub>4</sub>. Three films were tested for each composition.

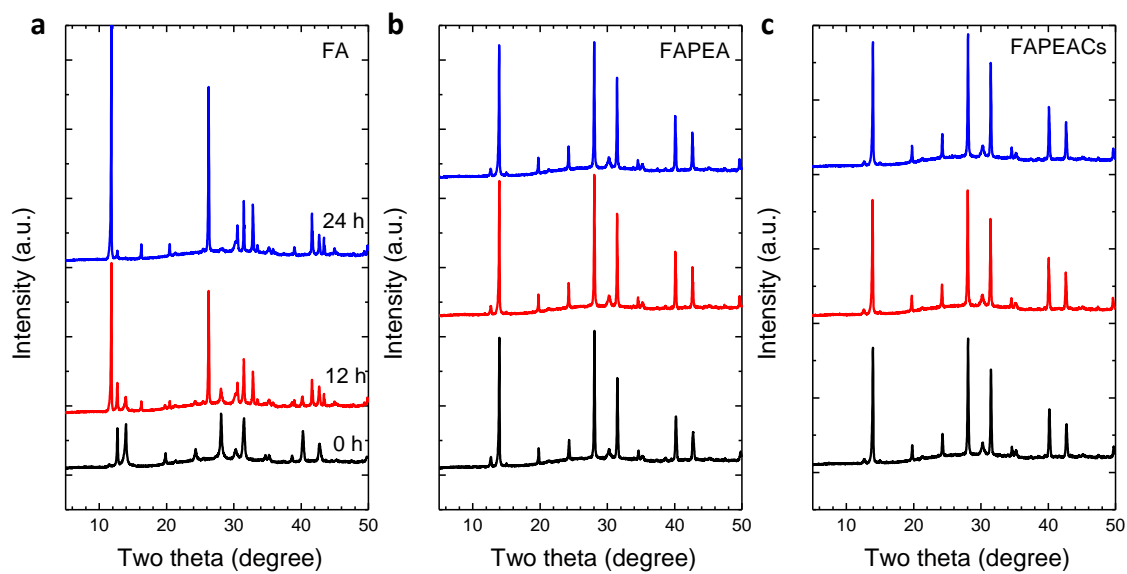

**Supplementary Figure 21| Evolution of X-ray diffraction patterns.** Evolution of XRD patterns of the perovskite films under relative humidity (RH) of  $80\pm 5\%$ . **(a)** bare  $\text{FAPbI}_3$  (FA), **(b)**  $\text{FAPbI}_3$  with 1.67 mol%  $\text{PEA}_2\text{PbI}_4$  (FAPEA) and **c**,  $\text{FA}_{0.98}\text{Cs}_{0.2}\text{PbI}_3$  with 1.67 mol%  $\text{PEA}_2\text{PbI}_4$  (FAPEACs).

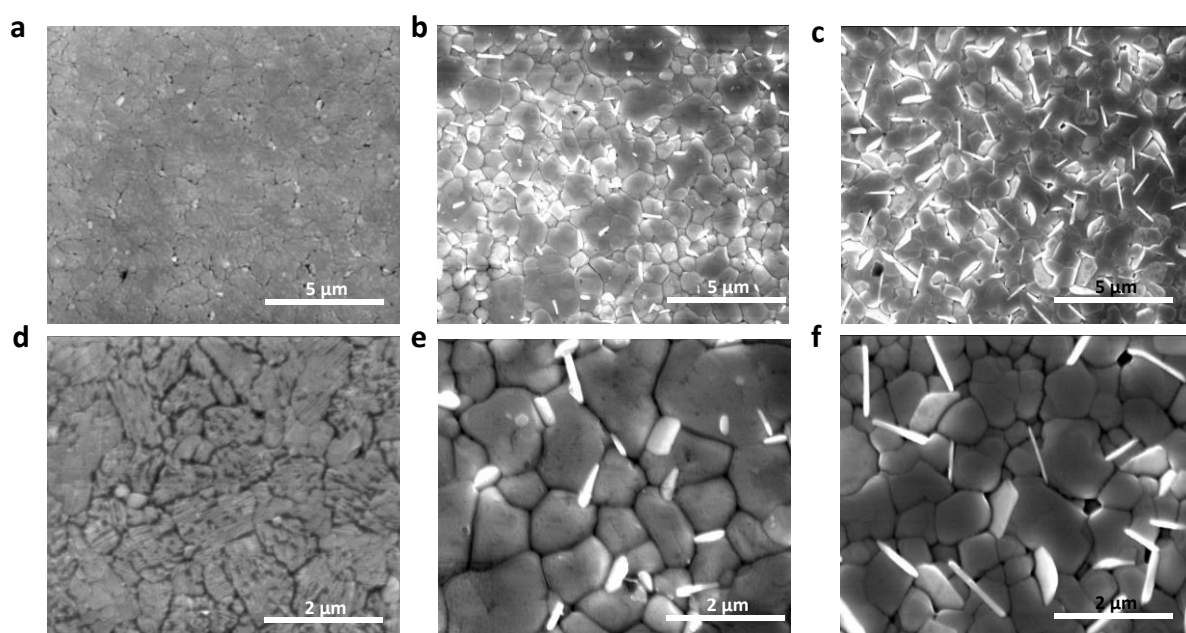

**Supplementary Figure 22| Morphology of FAPbI<sub>3</sub> film with added 2D perovskite.** Surface scanning electron microscopic (SEM) images of (a, d) bare FAPbI<sub>3</sub>, (b, e) FAPbI<sub>3</sub> with 1.67 mol% PEA<sub>2</sub>PbI<sub>4</sub> and (c, f) FAPbI<sub>3</sub> with 10.00 mol% PEA<sub>2</sub>PbI<sub>4</sub>. All the films were annealed at 150 °C for 10 min.

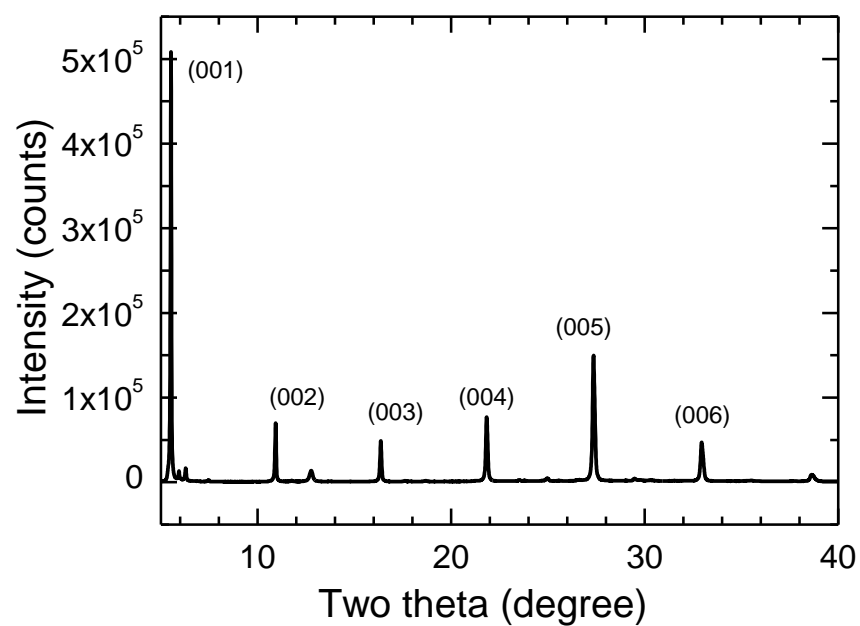

**Supplementary Figure 23| X-ray diffraction pattern of the  $\text{PEA}_2\text{PbI}_4$  perovskite film.**  
The film was coated on ITO substrate.<sup>1</sup>



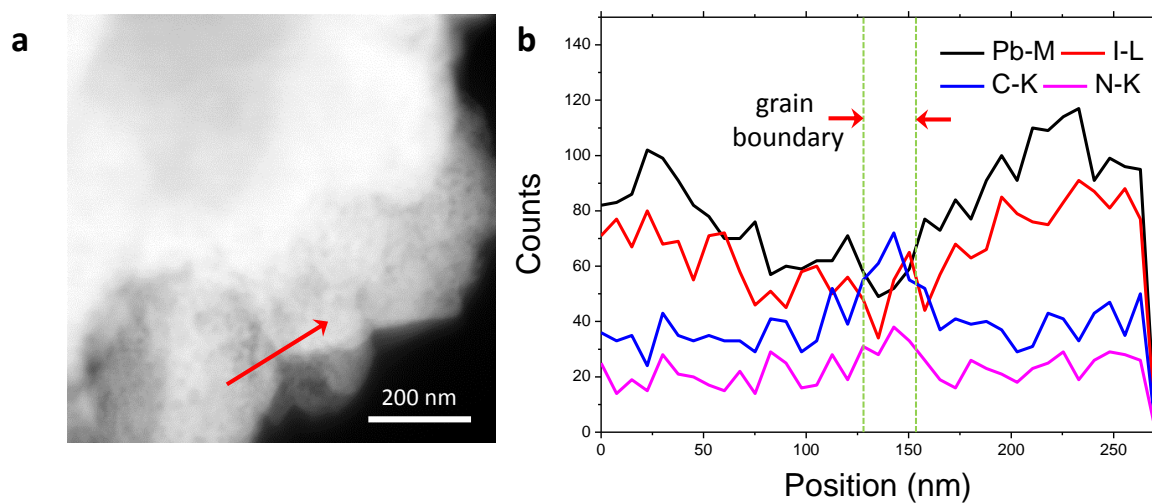

**Supplementary Figure 24| Energy dispersive X-ray spectroscopic (EDS) analysis.** (a) Drift corrected scanning transmission electron microscopic (STEM) image of the  $\text{FA}_{0.98}\text{Cs}_{0.02}\text{PbI}_3$  perovskite with 1.67 mol% of  $\text{PEA}_2\text{PbI}_4$  perovskite. A red arrow indicates the profile where EDS line analysis was performed. (b) Elemental distribution profile obtained from the EDS line scan. Grain boundary region is indicated with dashed line and red arrows.

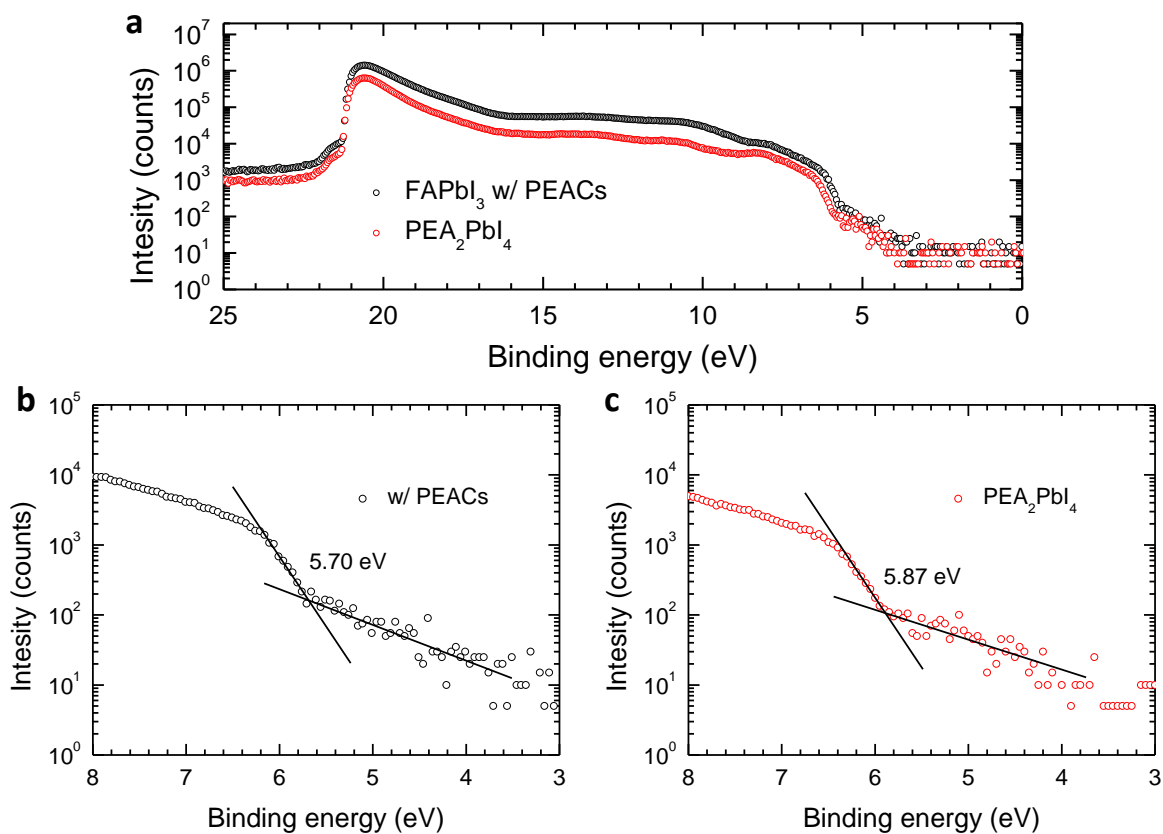

**Supplementary Figure 25| Ultraviolet photoelectron spectroscopic (UPS) analysis.** UPS analysis of FA<sub>0.98</sub>Cs<sub>0.02</sub>PbI<sub>3</sub> with 1.67 mol% PEA<sub>2</sub>PbI<sub>4</sub> and pure PEA<sub>2</sub>PbI<sub>4</sub> perovskite films. (a) Complete spectra and low binding energy onset of (b) FA<sub>0.98</sub>Cs<sub>0.02</sub>PbI<sub>3</sub> with 1.67 mol% PEA<sub>2</sub>PbI<sub>4</sub> and (c) pure PEA<sub>2</sub>PbI<sub>4</sub> perovskite films.

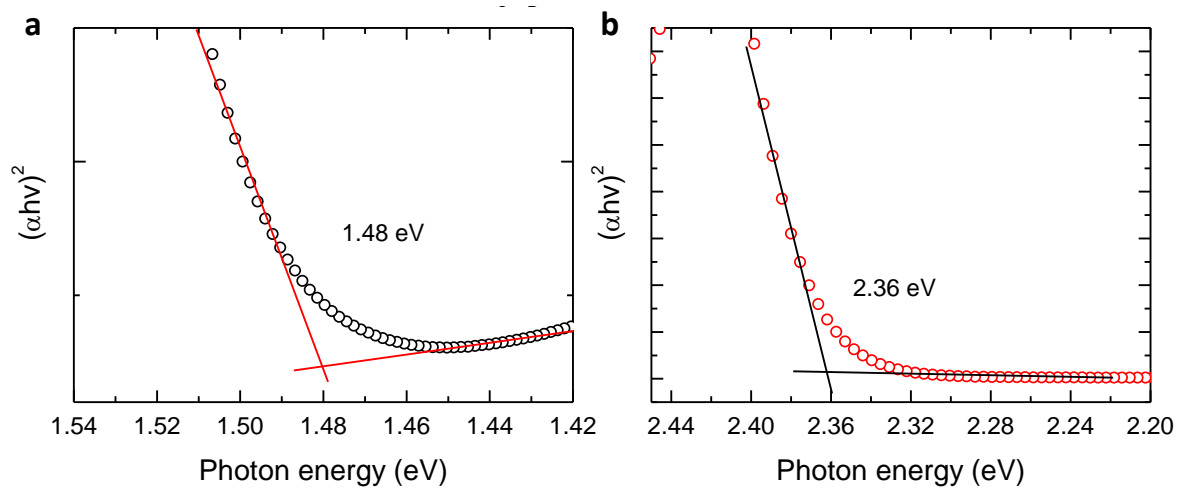

**Supplementary Figure 26 | Determination of bandgap using a Tauc plot.** Tauc plots for (a)  $\text{FA}_{0.98}\text{Cs}_{0.02}\text{PbI}_3$  perovskite with 1.67 mol%  $\text{PEA}_2\text{PbI}_4$  and (b) pure  $\text{PEA}_2\text{PbI}_4$  perovskite films. Onset region was fitted to derive the optical bandgap.

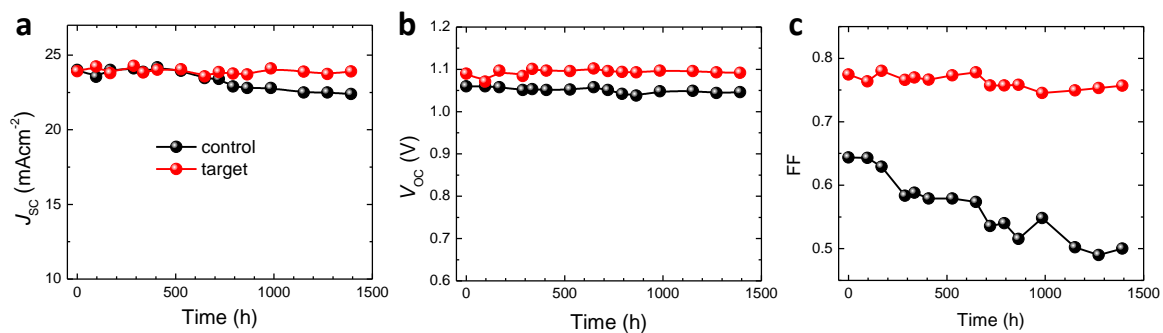

**Supplementary Figure 27| Ambient stability test of control and target devices.** Evolution of (a) short-circuit current density ( $J_{sc}$ ), (b) open circuit voltage ( $V_{oc}$ ) and (c) fill factor (FF) of the control and target device.

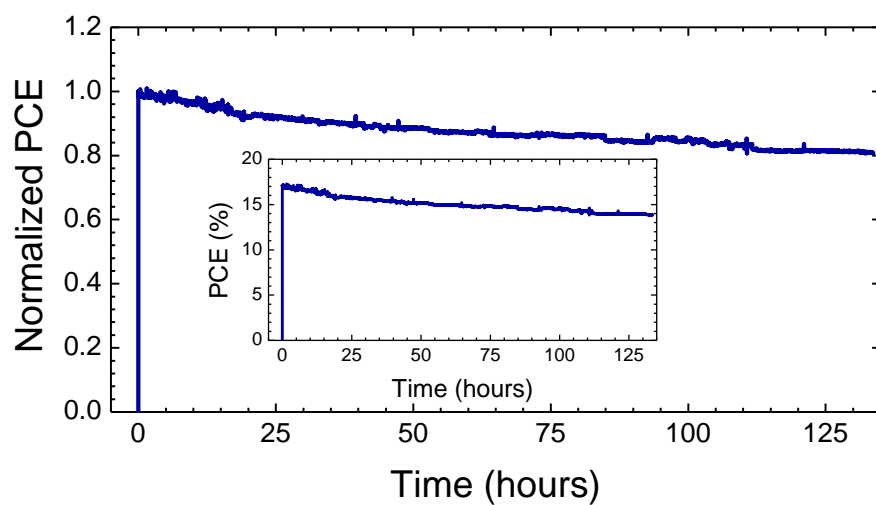

**Supplementary Figure 28| Maximum power point tracking of the target device.** The measurement was performed under 1 sun illumination in ambient condition with encapsulation. Inset of the figure shows the PCE without normalization.

**Supplementary Table 1| Fitted parameters for time resolved photoluminescence decay.** Biexponential and triexponential decay models were used for bare FAPbI<sub>3</sub> and FAPbI<sub>3</sub> with 2D perovskite respectively. The values in parenthesis indicate proportion of the each decay component.

|                | FAPbI <sub>3</sub> | w/ PEA <sub>2</sub> PbI <sub>2</sub> | w/ PEA <sub>2</sub> PbI <sub>4</sub> + Cs |
|----------------|--------------------|--------------------------------------|-------------------------------------------|
| A <sub>1</sub> | 672.6 (51.8%)      | 491.2 (46.5%)                        | 446.1 (42.4%)                             |
| τ <sub>1</sub> | 3.0                | 3.2                                  | 3.2                                       |
| A <sub>2</sub> | 625.4 (48.2%)      | 212.8 (20.2%)                        | 177.8 (16.9%)                             |
| τ <sub>2</sub> | 78.5               | 148.7                                | 177.7                                     |
| A <sub>3</sub> |                    | 351.4 (33.3%)                        | 428.2 (40.7%)                             |
| τ <sub>3</sub> |                    | 1037.5                               | 1140.2                                    |
|                | 39.4               | 376.9                                | 495.4                                     |

**Supplementary Table 2| Improved photovoltaic parameters with 2D perovskite and Cs.** Photovoltaic parameters of the device incorporating bare FAPbI<sub>3</sub> (FA), FAPbI<sub>3</sub> with 1.67 mol% PEA<sub>2</sub>PbI<sub>4</sub> (FAPEA) and FA<sub>0.98</sub>Cs<sub>0.02</sub>PbI<sub>3</sub> with 1.67 mol% PEA<sub>2</sub>PbI<sub>4</sub> (FAPEACs). The photovoltaic parameters are obtained from reverse scan (from  $V_{OC}$  to  $J_{SC}$ ) with scan rate of 0.1 Vs<sup>-1</sup>. All the devices were fabricated in same batch.

|         | $J_{SC}$ (mAcm <sup>-2</sup> ) | $V_{OC}$ (V) | FF          | PCE (%)    |
|---------|--------------------------------|--------------|-------------|------------|
| FA      | 23.82±0.27                     | 1.023±0.018  | 0.654±0.012 | 15.95±0.36 |
| FAPEA   | 24.16±0.40                     | 1.044±0.018  | 0.717±0.016 | 18.08±0.52 |
| FAPEACs | 24.37±0.25                     | 1.061±0.014  | 0.741±0.009 | 19.16±0.37 |

**Supplementary Table 3** | *d* spacing values for  $\text{FA}_{0.98}\text{Cs}_{0.02}\text{PbI}_3$  with 1.67 mol%  $\text{PEA}_2\text{PbI}_4$ . The values were calculated from X-ray diffraction pattern in Supplementary Fig. 8 using Bragg's law.<sup>2</sup>

| <i>hkl</i> | <i>d</i> (Å) |
|------------|--------------|
| 001        | 6.35         |
| 011        | 4.49         |
| 111        | 3.67         |
| 002        | 3.18         |
| 012        | 2.84         |
| 022        | 2.25         |
| 003        | 2.12         |



**Supplementary Table 4| Calculated  $d$  spacing values for PEA<sub>2</sub>PbI<sub>4</sub>.** The values were calculated from X-ray diffraction pattern in Supplementary Fig. 18 using Bragg's law.<sup>1</sup>

| $hkl$ | $d$ (Å) |
|-------|---------|
| 001   | 16.0    |
| 002   | 8.10    |
| 003   | 5.42    |
| 004   | 4.07    |
| 005   | 3.26    |
| 006   | 2.72    |

## Supplementary Note 1

### Optimization of the device by cesium incorporation

For optimization of the device, we first controlled the concentration and heat-treatment process for FAPbI<sub>3</sub> with 1.67 mol% PEA<sub>2</sub>PbI<sub>4</sub> perovskite. The data in **Supplementary Figs. 2 and 4** was obtained using low concentration (1 mmol of perovskite precursors in 600 mg of DMF) precursor solution with same annealing time (10 min at 150 °C) to avoid the effect of annealing time on crystallinity. With 2D perovskite, we were able to prolong the annealing time since it was thermally more stable compared to bare FAPbI<sub>3</sub>. The optimized annealing time was 20 min at 150 °C with 2D perovskite (For bare FAPbI<sub>3</sub>, the optimum annealing time was 10 min). Optimization of the heat-treatment and concentration (1 mmol of perovskite precursors in 560 mg of DMF) enhanced the average PCE up to 17.86±0.56% (**Supplementary Fig. 8**, with 0 mol% Cs). In addition to this, we noticed that incorporation of small amount of Cs (2 mol%) further improve the average PCE up to 19.00±0.69% due to enhancement in V<sub>OC</sub> and FF (**Supplementary Fig. S8**). The origin of the improvement might be passivation of defects as we discussed in the main text (bandgap of the perovskite was not changed, see **Supplementary Note 2**).

## Supplementary Note 2

### X-ray diffraction and absorption properties with 2 mol% Cs

It has been reported that incorporation of relatively smaller Cs cation into FAPbI<sub>3</sub> can increase the bandgap of the perovskite.<sup>3,4</sup> In the previous studies, typically higher than 5 mol% of the Cs was used to stabilize the FAPbI<sub>3</sub> while we incorporated only 2 mol% of Cs. We compare the X-ray diffraction (XRD) pattern and absorption spectrum of the perovskite films without and with 2 mol% Cs. As seen in **Supplementary Fig. S9a**, XRD patterns were similar with and without 2 mol% Cs. The absorption spectra of the films with and without 2 mol% Cs were also almost identical as seen in **Supplementary Fig. 9b**, which indicates bandgap of the perovskite is maintained after addition of 2 mol% of Cs (The bandgap was determined to be 1.48 eV as seen in **Supplementary Fig. 26**). As a result, external quantum efficiency (EQE) spectrum of our target device shows almost identical onset (rather slightly red shifted) with bare FAPbI<sub>3</sub> device (**Fig. 2d** in main text). Surface scanning electron microscopic (SEM) images of the films were compared in **Supplementary Fig. 10**. Relatively larger grains without specific shape were observed with bare FAPbI<sub>3</sub> while relatively smaller granular grains were observed with 2D perovskite. The grain size was decreased with 2 mol% of Cs, which is correlated with slight decrease of peak intensity in XRD spectrum.

### Supplementary Note 3

#### Impact of 2 mol% Cs on stability and optoelectronic properties of FAPbI<sub>3</sub>

Typically, at least 10 mol% replacement of FA with Cs (5 mol% in combination with 17 mol% of MA) is required to stabilize the black perovskite phase in case of pure FAPbI<sub>3</sub>.<sup>3-5</sup> We believe that the 2 mol% replacement of FA with Cs reduces the defect density as observed from time-resolved photoluminescence in **Fig. 2**, but it does not play critical roles in our system. For example, we compared phase-stability of the FAPbI<sub>3</sub> and FA<sub>0.98</sub>Cs<sub>0.02</sub>PbI<sub>3</sub> perovskite film under relative humidity of 70±5% (**Supplementary Fig. 11**). As can be seen in the photos and X-ray diffraction (XRD) patterns of the films, both of FAPbI<sub>3</sub> and FA<sub>0.98</sub>Cs<sub>0.02</sub>PbI<sub>3</sub> perovskite films were rapidly degraded within 24 h. The black color of the films was rapidly changed to yellow, which can be attributed to conversion of the cubic perovskite phase to yellow hexagonal non-perovskite phase. We also compared the steady-state and time-resolved photoluminescence (PL) properties of the FAPbI<sub>3</sub> and FA<sub>0.98</sub>Cs<sub>0.02</sub>PbI<sub>3</sub> perovskite films in **Supplementary Fig. 12**. As seen in **Supplementary Fig. 12a**, the peak PL intensity of bare FA<sub>0.98</sub>Cs<sub>0.02</sub>PbI<sub>3</sub> is  $9.39 \times 10^5$  which was improved to  $1.17 \times 10^6$  with 2 mol% of Cs. The PL lifetime of FAPbI<sub>3</sub> (40.4 ns) was prolonged to 52.0 ns with incorporation of 2 mol% Cs. However, the improvement in PL intensity and lifetime is much less compared to that observed with addition of 2D perovskite (around 5 and 10 times enhancement in PL intensity and lifetime, respectively). Therefore, we concluded that improvement of the phase-stability and optoelectronic quality of the perovskite film is predominantly due to the addition of 2D perovskite.

#### Supplementary Note 4

##### Presence of 2D perovskite

In **Supplementary Figs. 10b** and **c**, bright colored plates are sparsely observed with addition of 1.67 mol% of 2D perovskite into precursor solution. The morphology of plates in **Supplementary Figs. 10b** and **c** is clearly distinguished from one in **Supplementary Fig. 10a**, which might be the thermally induced  $\text{PbI}_2$ . We speculated the plates are crystallized 2D perovskite. Although it was not detected in XRD patterns, surface SEM images in **Supplementary Fig. 22** support this speculation. Compared to bare  $\text{FAPbI}_3$  (**Supplementary Figs. 22a** and **d**), the bright colored plates were formed between grains with addition of 5 mol% of 2D perovskite (**Supplementary Figs. 22b** and **e**). The amount and size of the plates were further enhanced with addition of 10 mol% of 2D perovskite (**Supplementary Figs. 22c** and **f**) although the amount of  $\text{PbI}_2$  in XRD was not increased (**Supplementary Fig. 4**).

## Supplementary References

- 1 Ma, D. *et al.* Single-crystal microplates of two-dimensional organic–inorganic lead halide layered perovskites for optoelectronics. *Nano Research* **10**, 2117-2129 (2017).
- 2 Saidaminov, M. I., Abdelhady, A. L., Maculan, G. & Bakr, O. M. Retrograde solubility of formamidinium and methylammonium lead halide perovskites enabling rapid single crystal growth. *Chem. Commun.* **51**, 17658-17661 (2015).
- 3 Lee, J. W. *et al.* Formamidinium and Cesium Hybridization for Photo-and Moisture-Stable Perovskite Solar Cell. *Adv. Energy Mater.* **5**, 1501310 (2015).
- 4 Saliba, M. *et al.* Cesium-containing triple cation perovskite solar cells: improved stability, reproducibility and high efficiency. *Energy Environ. Sci.* **9**, 1989-1997 (2016).
- 5 McMeekin, D. P. *et al.* A mixed-cation lead mixed-halide perovskite absorber for tandem solar cells. *Science* **351**, 151-155 (2016).
